# Supplementary material
Source: PubMed Central journal article supplement (PMC10129133)
Supplement: mmc1.pdf [file mmc1.pdf]

# THE LANCET

## Microbe

### Supplementary appendix 1

This translation in Spanish was submitted by the authors and we reproduce it as supplied. It has not been peer reviewed. The Lancet's editorial processes have only been applied to the original in English, which should serve as reference for this manuscript.

Los autores nos proporcionaron esta traducción al español y la reproducimos tal como nos fue entregada. No la hemos revisado. Los procesos editoriales de The Lancet se han aplicado únicamente al original en inglés, que debe servir de referencia para este manuscrito.

Supplement to: Bermejo-Martin JF, García-Mateo N, Motos A, et al. Effect of viral storm in patients admitted to intensive care units with severe COVID-19 in Spain: a multicentre, prospective, cohort study . *Lancet Microbe* 2023; published online April 25. [https://doi.org/10.1016/S2666-5247\(23\)00041-1](https://doi.org/10.1016/S2666-5247(23)00041-1).

Antecedentes: la contribución del virus a la patogénesis de la COVID-19 grave es todavía controvertida. En este estudio evaluamos la asociación entre la carga de ARN vírico en plasma y la respuesta inmunológica, las complicaciones y la mortalidad en pacientes COVID-19 críticos.

Métodos: estudio prospectivo de cohortes en 23 hospitales de España. Se incluyeron pacientes adultos ( $\geq 18$  años) con infección por SARS-CoV-2 confirmada por laboratorio que fueron ingresados en la unidad de cuidados intensivos entre el 16 de Marzo de 2020 y el 27 de Febrero de 2021. El ARN de la región 1 de la nucleocápside (N1) del SARS-CoV-2 se cuantificó en plasma recogido en las primeras 48 horas desde el ingreso, utilizando PCR digital. Los pacientes se dividieron en tres grupos, dependiendo de su carga de ARN de N1: VIR-N1-Zero ( $<1$  N1 copias por mL), VIR-N1-Low (1–2747 N1 copias por mL), y VIR-N1-Storm ( $>2747$  N1 copias por mL). La variable de desenlace primaria fue la mortalidad por cualquier causa a 90 días tras el ingreso. Se evaluó el odds ratio (ORs) para la variable de desenlace primaria utilizando un análisis de regresión logística.

Resultados: 1068 pacientes cumplieron los criterios de inclusión, de los cuales 117 tuvieron un volumen de plasma insuficiente y en 115 faltaba información clínica clave. Se incluyeron 836 pacientes en el análisis, de los cuales 403 (48%) estaban en el grupo VIR-N1-Low, 283 (34%) en el VIR-N1-Storm, y 150 (18%) en el VIR-N1-Zero. En total, los pacientes del grupo VIR-N1-Storm presentaron la mayor gravedad: 266 (94%) de 283 pacientes recibieron ventilación mecánica invasiva (VMI), 116 (41%) desarrollaron fallo renal agudo, 180 (65%) sufrieron infecciones secundarias, y 148 (52%) murieron en los primeros 90 días. Los pacientes del grupo VIR-N1-Zero fueron los menos graves: 81 (54%) de 150 recibieron VMI, 34 (23%) desarrollaron fallo renal agudo, 47 (32%) sufrieron infecciones secundarias, y 26 (17%) murieron en los primeros 90 días (OR para muerte 0-30, 95% IC 0-16–0-55;  $p < 0-0001$ , comparado con el grupo VIR-N1-Storm). 106 (26%) de 403 pacientes del grupo VIR-N1-Low habían muerto a los 90 días (OR para muerte 0-39, 95% IC 0-26–0-57;  $p < 0-0001$ , comparado con el grupo VIR-N1-Storm).

Interpretación: La presencia de una así llamada tormenta vírica se asocia con un aumento de la mortalidad por cualquier causa en pacientes ingresados en la UCI por COVID-19 grave. Prevenir esta tormenta vírica puede ayudar a mejorar el pronóstico. La presencia de una tormenta vírica puede constituir un marcador de enriquecimiento predictivo para el tratamiento con antivirales o dispositivos de purificación destinados a retirar componentes víricos de la sangre.

Financiación: Instituto de Salud Carlos III, Canadian Institutes of Health Research, Li Ka-Shing Foundation, Research Nova Scotia, European Society of Clinical Microbiology and Infectious Diseases.
