# Supplementary material
Source: PubMed Central journal article supplement (PMC10129133)
Supplement: mmc2.pdf [file mmc2.pdf]

# THE LANCET Microbe

## Supplementary appendix 2

This appendix formed part of the original submission and has been peer reviewed. We post it as supplied by the authors.

Supplement to: Bermejo-Martin JF, García-Mateo N, Motos A, et al. Effect of viral storm in patients admitted to intensive care units with severe COVID-19 in Spain: a multicentre, prospective, cohort study . *Lancet Microbe* 2023; published online April 25. [https://doi.org/10.1016/S2666-5247\(23\)00041-1](https://doi.org/10.1016/S2666-5247(23)00041-1).

| <b>CIBERES-UCI-COVID Group</b> |                        |                                                                                                                                                                                                                                                                                                          |
|--------------------------------|------------------------|----------------------------------------------------------------------------------------------------------------------------------------------------------------------------------------------------------------------------------------------------------------------------------------------------------|
| <b>First Name</b>              | <b>Surname</b>         | <b>Affiliation</b>                                                                                                                                                                                                                                                                                       |
| Alicia                         | Ortega                 | Group for Biomedical Research in Sepsis (BioSepsis), Instituto de Investigación Biomédica de Salamanca, Gerencia Regional de Salud de Castilla y León, Salamanca, Spain & Centro de Investigación Biomédica en Red en Enfermedades Respiratorias (CIBERES), Instituto de Salud Carlos III, Madrid, Spain |
| Amanda                         | de la Fuente           |                                                                                                                                                                                                                                                                                                          |
| Ana P                          | Tedim                  |                                                                                                                                                                                                                                                                                                          |
| Raquel                         | Almansa                | Department of Cellular Biology, Hystology and Pharmacology, University of Valladolid, Valladolid, Spain & Centro de Investigación Biomédica en Red en Enfermedades Respiratorias (CIBERES), Instituto de Salud Carlos III, Madrid, Spain                                                                 |
| Lara                           | Sánchez Recio          | Group for Biomedical Research in Sepsis (BioSepsis), Instituto de Investigación Biomédica de Salamanca, Gerencia Regional de Salud de Castilla y León, Salamanca, Spain                                                                                                                                  |
| Tamara                         | Postigo                |                                                                                                                                                                                                                                                                                                          |
| Noelia                         | Jorge                  | Centro de Investigación Biomédica en Red en Enfermedades Respiratorias (CIBERES), Instituto de Salud Carlos III, Madrid, Spain                                                                                                                                                                           |
| Laura                          | González-González      |                                                                                                                                                                                                                                                                                                          |
| Wysali                         | Trapiello              | Clinical Analysis Service, Hospital Clínico Universitario de Valladolid, Gerencia Regional de Salud de Castilla y León, Valladolid, Spain                                                                                                                                                                |
| José Ángel                     | Berezo                 | Critical Care Medicine Service, Hospital Universitario Río Hortega, Gerencia Regional de Salud de Castilla y León, Valladolid, Spain & Centro de Investigación Biomédica en Red en Enfermedades Respiratorias (CIBERES), Instituto de Salud Carlos III, Madrid, Spain                                    |
| Rubén                          | Herrán-Monge           |                                                                                                                                                                                                                                                                                                          |
| Jesús                          | Blanco                 | Critical Care Medicine Service, Hospital Universitario Río Hortega, Gerencia Regional de Salud de Castilla y León, Valladolid, Spain                                                                                                                                                                     |
| Pedro                          | Enríquez               |                                                                                                                                                                                                                                                                                                          |
| Isidoro                        | Martínez               | Centro Nacional de Microbiología, Instituto de Salud Carlos III, Majadahonda, Spain & Centro de Investigación Biomédica en Red en Enfermedades Infecciosas (CIBERINFEC), Instituto de Salud Carlos III, Madrid, Spain                                                                                    |
| María José                     | Muñoz-Gómez            |                                                                                                                                                                                                                                                                                                          |
| María                          | Martín-Vicente         |                                                                                                                                                                                                                                                                                                          |
| Vicente                        | Más                    |                                                                                                                                                                                                                                                                                                          |
| Mónica                         | Vázquez                |                                                                                                                                                                                                                                                                                                          |
| Olga                           | Cano                   | Critical Care Medicine Service, Hospital Infanta Leonor, Madrid, Spain                                                                                                                                                                                                                                   |
| Amalia                         | Martínez de la Gándara |                                                                                                                                                                                                                                                                                                          |
| Covadonga                      | Rodríguez              |                                                                                                                                                                                                                                                                                                          |
| Gloria                         | Andrade                | Critical Care Medicine Service, Hospital Clínico Universitario de Valladolid, Gerencia Regional de Salud de Castilla y León, Valladolid, Spain                                                                                                                                                           |
| Gloria                         | Renado                 |                                                                                                                                                                                                                                                                                                          |
| Ramón                          | Cicuendez Ávila        | Cardiovascular Surgery Service, Hospital Clínico Universitario de Valladolid, Gerencia Regional de Salud de Castilla y León, Valladolid, Spain                                                                                                                                                           |
| Juan                           | Bustamante-Munguira    |                                                                                                                                                                                                                                                                                                          |
| María                          | Salgado-Villén         | Critical Care Medicine Service, Hospital Punta de Europa, Algeciras, Spain                                                                                                                                                                                                                               |
| Enrique                        | Berruguilla-Pérez      | Unidad de Gestión Clínica de Análisis Clínicos, Hospital Punta de Europa, Algeciras, Spain                                                                                                                                                                                                               |
| Estel                          | Güell                  | Department of Intensive Care Medicine, Hospital de Mataró, Mataró, Spain                                                                                                                                                                                                                                 |
| Fernando Javier                | Casadieago Monachello  |                                                                                                                                                                                                                                                                                                          |
| María                          | Recuerda Núñez         | Intensive Care Unit, Hospital Universitario de Jerez, Departamento de Medicina Universidad de Cádiz, INiBICA, Jerez de la Frontera, Spain                                                                                                                                                                |

|              |                 |                                                                                                                                                                                                                                                                                              |
|--------------|-----------------|----------------------------------------------------------------------------------------------------------------------------------------------------------------------------------------------------------------------------------------------------------------------------------------------|
| Juan Manuel  | Sánchez Calvo   | Microbiology Department, Hospital Universitario de Jerez, Jerez de la Frontera, Spain                                                                                                                                                                                                        |
| Yhivian      | Peñasco-Martín  | Critical Care Medicine Service, Hospital Universitario Marqués de Valdecilla, Santander, Spain                                                                                                                                                                                               |
| María Teresa | García Unzueta  | Servicio de Análisis Clínicos, Hospital Universitario Marqués de Valdecilla, Santander, Spain                                                                                                                                                                                                |
| Adrián       | Ceccato         | Critical Care Center, Institut d'Investigació i Innovació Parc Taulí I3PT; Hospital Universitari Sagrat Cor, Sabadell, Spain & Centro de Investigación Biomédica en Red en Enfermedades Respiratorias (CIBERES), Instituto de Salud Carlos III, Madrid, Spain                                |
| Laia         | Fernández-Barat | Department of Pulmonology, Hospital Clinic de Barcelona, Institut D Investigacions August Pi I Sunyer (IDIBAPS), Universidad de Barcelona, Barcelona, Spain & Centro de Investigación Biomédica en Red en Enfermedades Respiratorias (CIBERES), Instituto de Salud Carlos III, Madrid, Spain |
| María Teresa | Bouza Vieiro    | Critical Care Department, Hospital Universitario Lucus Augustí, Lugo, Spain                                                                                                                                                                                                                  |
| Ana          | Moreno-Romero   | Clinical Analysis Service, Hospital Universitario Príncipe de Asturias, Alcalá de Henares, Spain                                                                                                                                                                                             |
| Leire        | Pérez Bastida   | Critical Care Medicine Service, Complejo Asistencial Universitario de Palencia, Gerencia Regional de Salud de Castilla y León, Palencia, Spain                                                                                                                                               |
| Noelia       | Albalá Martínez | Critical Care Medicine Service, Complejo Asistencial de Salamanca, Gerencia Regional de Salud de Castilla y León, Salamanca, Spain                                                                                                                                                           |
| José Manuel  | Gómez           | Critical Care Medicine Service, Hospital General Universitario Gregorio Marañón, Madrid, Spain                                                                                                                                                                                               |
| María Luisa  | Blasco          | Intensive Care Unit, Hospital Clínico Universitario de Valencia, Valencia, Spain                                                                                                                                                                                                             |
| Jesús        | Caballero       | Critical Care Medicine Service, Hospital Universitari Arnau de Vilanova, Lleida, Spain                                                                                                                                                                                                       |
| Carme        | Barberà         | Critical Care Medicine Service, Hospital Universitari de Santa Maria, Lleida, Spain                                                                                                                                                                                                          |
| Jessica      | González        | Translational Research in Respiratory Medicine, Hospital Universitario Arnau de Vilanova y Santa Maria, IRB Lleida, Lleida Spain & Centro de Investigación Biomédica en Red en Enfermedades Respiratorias (CIBERES), Instituto de Salud Carlos III, Madrid, Spain                            |
| María Teresa | Nieto           | Critical Care Medicine Service, Hospital General de Segovia, Gerencia Regional de Salud de Castilla y León, Segovia, Spain                                                                                                                                                                   |
| Lorena       | del Río-Carbajo | Intensive Care Unit, Complejo Hospitalario Universitario de Ourense, Ourense, Spain                                                                                                                                                                                                          |
| Jorge        | Nieto-del Olmo  |                                                                                                                                                                                                                                                                                              |
| Estefanía    | Prol-Silva      |                                                                                                                                                                                                                                                                                              |
| Joan         | Canseco-Ribas   | Department of Pulmonology, Hospital Clinic de Barcelona, Institut D Investigacions August Pi I Sunyer (IDIBAPS), Universidad de Barcelona, Barcelona, Spain                                                                                                                                  |
| Jose María   | Eiros           | Microbiology Service, Hospital Universitario Río Hortega, Gerencia Regional de Salud de Castilla y León, Valladolid, Spain                                                                                                                                                                   |

| <b>List of Recruiting Hospitals</b> |                                                                       |
|-------------------------------------|-----------------------------------------------------------------------|
| 1                                   | Hospital Universitario Rio Hortega, Valladolid, Spain                 |
| 2                                   | Hospital Infanta Leonor, Madrid, Spain                                |
| 3                                   | Hospital Clínico Universitario de Valladolid, Valladolid, Spain       |
| 4                                   | Hospital San Pedro de Alcántara, Cáceres, Spain                       |
| 5                                   | Hospital Punta de Europa, Algeciras, Spain                            |
| 6                                   | Hospital de Mataró, Mataró, Spain                                     |
| 7                                   | Hospital Universitario de Jerez, Jerez de la Frontera, Spain          |
| 8                                   | Hospital Universitario Marqués de Valdecilla, Santander, Spain        |
| 9                                   | Hospital Universitario Lucus Augustí, Lugo, Spain                     |
| 10                                  | Hospital Universitario Príncipe de Asturias, Alcalá de Henares, Spain |
| 11                                  | Hospital Son Llàtzer, Palma, Spain.                                   |
| 12                                  | Complejo Asistencial Universitario de Palencia, Palencia, Spain       |
| 13                                  | Complejo Hospitalario Universitario de Ourense, Ourense, Spain        |
| 14                                  | Complejo Asistencial de Salamanca, Salamanca, Spain                   |
| 15                                  | Hospital General Universitario Gregorio Marañón, Madrid, Spain        |
| 16                                  | Hospital Clínico Universitario de Valencia, Valencia, Spain           |
| 17                                  | Hospital Universitario Arnau de Vilanova y Santa María, Lleida, Spain |
| 18                                  | Hospital Universitario de Torrejón, Torrejón de Ardoz, Spain          |
| 19                                  | Hospital Universitario de León, León, Spain                           |
| 20                                  | Hospital General de Segovia, Segovia, Spain                           |
| 21                                  | Hospital Nuestra Señora de Gracia, Zaragoza, Spain                    |
| 22                                  | Hospital Universitario de la Paz, Madrid, Spain                       |
| 23                                  | Hospital Universitario Nuestra Señora de Valme, Sevilla, Spain        |

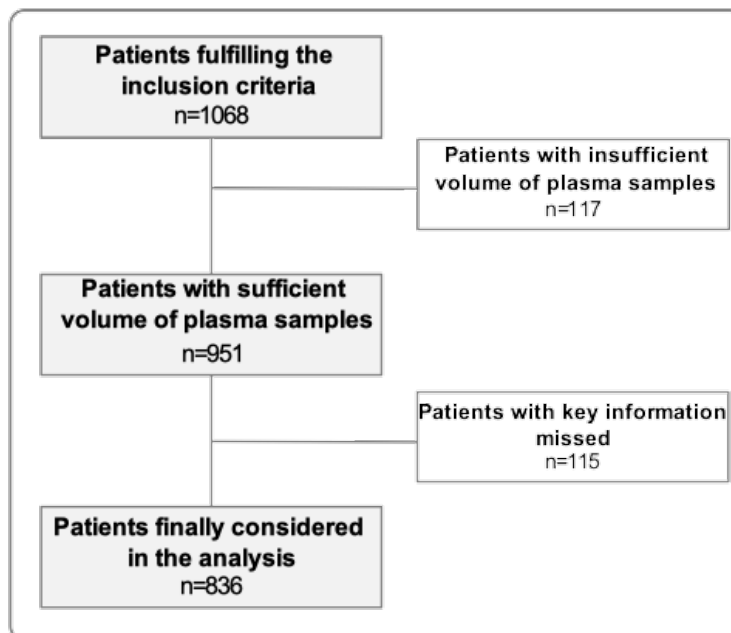

**Supplementary file 1.** Flow chart depicting numbers of patients included and excluded from the study.

**Supplementary file 2.** Methodology to profile anti-SARS-CoV-2 S antibodies in plasma and plasma's inhibition activity of the binding between the SARS-CoV-2 S protein and ACE2

**Immunoassay for antibody quantification:** a specific immunoassay was developed to quantify anti-SARS-CoV-2 S IgG and IgM antibodies in plasma. The plasmid pαH coding for the S protein ectodomain (residues 1-1208) of the SARS-CoV-2 2019-nCoV (GenBank: MN908947) was kindly provided by Dr. Jason McLellan (the University of Texas at Austin-USA) [1]. Mutagenesis was carried out to obtain a HexaPro construct that allowed a high-yield production of a stabilized prefusion spike protein [2]. The following substitutions were included at the ectodomain: glycine at residue 614 (D614G), a "GSAS" substitution at the furin cleavage site (residues 682–685), and proline at residues 817, 892, 899, 942, 986, and 987. For trimerization and purification, the C-terminal end of the S protein ectodomain was fused to the T4 fibrin trimerization motif (foldon), an HRV3C protease cleavage site, and an 8XHisTag. The expression vector coding for the SARS-CoV-2 S protein ectodomain was used to transiently transfect FreeStyle 293F cells (Thermo Fisher, Waltham, MA, USA) using polyethylenimine. The S protein domain was purified from filtered cell supernatants using Ni-NTA resins (Sigma Aldrich, San Luis, MO, USA) and subjected to an additional purification step by size-exclusion chromatography using a Superose 6 10/300 column (GE Healthcare, Chicago, IL, USA).

**Antibody titration:** Antibody titers against the S protein were determined by incubating serial dilutions of serum samples (starting at a 1:50 dilution) with the purified S protein ectodomain. Ninety-six well plates were coated with 200 ng per well of the S protein ectodomain. The following day, serum samples were added, and the binding to the S protein was determined by successive incubations with a secondary peroxidase-conjugated anti-human IgG or IgM (Jackson ImmunoResearch, West Grove, PA, USA) antibody and the OPD substrate (Sigma Aldrich, San Luis, MO, USA). One phase exponential decay least-squares fit curves, and the area under the curve (AUC) was calculated by using GraphPad Prism 8.0 (GraphPad Software, Inc., San Diego, CA, USA) and the following parameters: Baseline (cut-off value for each plate) Y= the average of the optical density values of blank wells (no S protein) plus three standard deviations; ignore peaks that are less than 10% of the distance from minimum to maximum Y; all peaks must go above the baseline. The AUC is expressed as X units times the Y units.

**ACE2 binding inhibition assay:** An ELISA binding inhibition assay of soluble ACE2 receptor to the SARS-CoV-2 S protein was performed as follows: Fifty nanograms per well of the S protein ectodomain were captured by a chimeric version of a monoclonal anti-Foldon antibody [3] previously coated in 96 well plates. Next, a 1:10 dilution of the different serum samples was added, and plates were incubated for 45 min at room temperature (RT). Then, one µg of the cell receptor ACE2 complexed with StrepTactin-peroxidase (Bio-Rad; Halle, Germany) was added to each well,

incubated for 15 min at RT, revealed with the OPD substrate (Sigma Aldrich, San Luis, MO, USA), and the OD<sub>493</sub> was measured in a spectrophotometer. The assay background was determined in parallel plates coated with a locked closed conformation of the S protein unable to bind the ACE2 receptor. A pool of sera from individuals negative for anti-S antibodies, collected in 2016, was used as a control. After subtraction of the background, the percentage of inhibition was calculated as  $[1 - (\text{OD}_{493} \text{ test serum} / \text{OD}_{493} \text{ control serum})] \times 100 \%$ . The percentage of inhibition relative to ACE2 in which the StrepTag was removed was further calculated as  $(\% \text{ inhibition of serum samples} / \% \text{ inhibition of ACE2}) \times 100 \%$ .

#### References:

1. Wrapp D, Wang N, Corbett KS, et al. Cryo-EM structure of the 2019-nCoV spike in the prefusion conformation. *Science* **2020**; 367:1260–1263.
2. Hsieh C-L, Goldsmith JA, Schaub JM, et al. Structure-based design of prefusion-stabilized SARS-CoV-2 spikes. *Science* **2020**; 369:1501–1505.
3. Battles MB, Mas V, Olmedillas E, Cano O, Vazquez M, Rodriguez L, et al. Structure and immunogenicity of pre-fusion-stabilized human metapneumovirus F glycoprotein. *Nat Commun* **2017**; 8(1):1528.

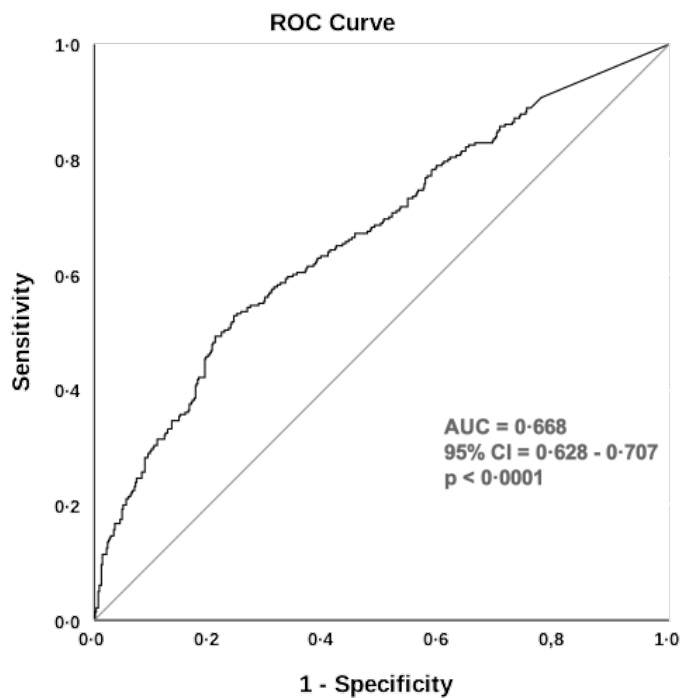

**Supplementary file 3.** Receiver operating characteristic curve to evaluate accuracy of the [SARS-CoV-2 N1 RNA] in plasma to identify non survivors in the first 90 days following admission to the ICU. Cut-off point: 2747 copies/ml, sensitivity 0.529, specificity: 0.757, Youden index: 0.286



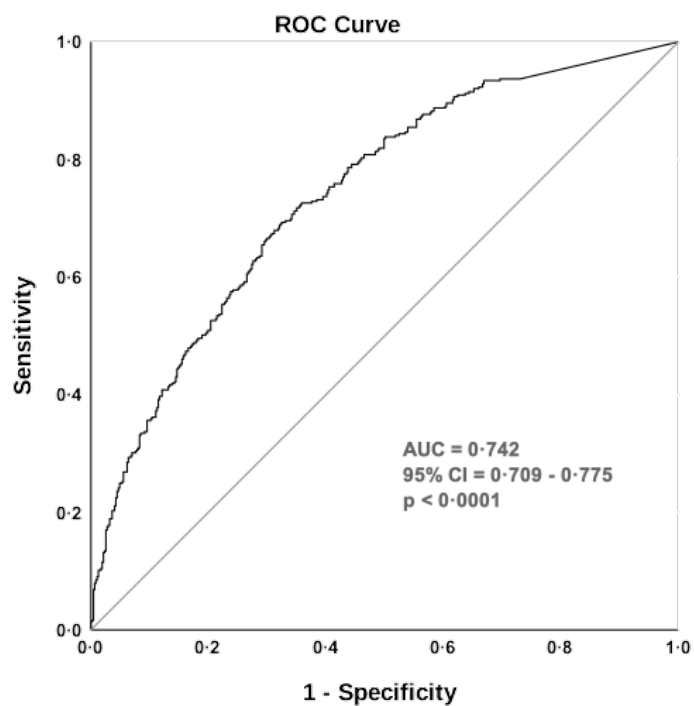

**Supplementary file 4.** Receiver operating characteristic curve to evaluate accuracy of the [SARS-CoV-2 N1 RNA] in plasma to identify N-Antigenemia. Cut-off point: 1010 copies/ml, sensitivity 0.693, specificity: 0.675, Youden index: 0.368.

| Secondary infections                | All patients | VIR-N1-Zero | VIR-N1-Low  | VIR-N1-Storm |
|-------------------------------------|--------------|-------------|-------------|--------------|
| <b>Secondary infections [n (%)]</b> | 435 (32·20)  | 47 (32·20)  | 208 (52·10) | 180 (65·00)  |
| Lungs                               | 287 (66·00)  | 28 (60·90)  | 132 (63·50) | 127 (71·30)  |
| Gastrointestinal system             | 4 (0·90)     | 0 (0·00)    | 3 (1·40)    | 1 (0·60)     |
| Urinary tract                       | 52 (12·00)   | 5 (10·60)   | 30 (14·40)  | 17 (9·40)    |
| Skin and soft tissue                | 3 (0·70)     | 0 (0·00)    | 2 (1·00)    | 1 (0·60)     |
| Central nervous system              | 1 (0·20)     | 0 (0·00)    | 0 (0·00)    | 1 (0·60)     |
| Bloodstream                         | 85 (19·50)   | 13 (27·70)  | 41 (10·70)  | 31 (17·20)   |
| Unknown                             | 3 (0·70)     | 1 (2·10)    | 0 (0·00)    | 2 (1·10)     |

**Supplementary file 5.** Secondary infections in VIR-N1-Zero, VIR-N1-Low and VIR-N1-Storm patients. Statistics: categorical variables are represented as [n, (%)].

| Causes of 90-day mortality      | All patients | VIR-N1-Zero | VIR-N1-Low  | VIR-N1-Storm |
|---------------------------------|--------------|-------------|-------------|--------------|
| <b>90-day mortality [n (%)]</b> | 280 (33·50)  | 26 (17·30)  | 106 (26·30) | 148 (52·30)  |
| Multi organ failure             | 121 (43·20)  | 8 (30·80)   | 49 (46·20)  | 64 (43·80)   |
| Respiratory failure             | 123 (43·90)  | 7 (26·90)   | 46 (43·40)  | 70 (47·90)   |
| Heart failure                   | 1 (0·40)     | 0 (0·00)    | 0 (0·00)    | 1 (0·70)     |
| Septic shock                    | 22 (7·90)    | 8 (30·80)   | 6 (5·70)    | 8 (5·50)     |
| Other causes                    | 11 (3·90)    | 3 (11·50)   | 5 (4·70)    | 3 (2·10)     |
| Unknown                         | 2 (0·40)     | 0 (0·00)    | 0 (0·00)    | 2 (1·40)     |

**Supplementary file 6.** Causes of mortality in VIR-N1-Zero, VIR-N1-Low and VIR-N1-Storm patients. Statistics: categorical variables are represented as [n, (%)].

| Measurements at ICU admission                              | All patients                     | VIR-N1-Zero (1)                 | VIR-N1-Low (2)                   | VIR-N1-Storm (3)                  | p value (1 vs. 2)  | p value (1 vs. 3)  | p value (2 vs. 3)  |
|------------------------------------------------------------|----------------------------------|---------------------------------|----------------------------------|-----------------------------------|--------------------|--------------------|--------------------|
| No. (%)                                                    | 836                              | 150 (17.94)                     | 403 (48.20)                      | 283 (33.85)                       | -                  | -                  | -                  |
| Temperature (°C) [median (Q1,Q3)]                          | 36.70 (36.00,37.40)              | 36.60 (36.00,37.20)             | 36.70 (36.10,37.40)              | 36.80 (36.00,37.50)               | n.s                | n.s                | n.s                |
| Glucose (mg/dL) [median (Q1,Q3)]                           | 155.00<br>(126.00,208.75)        | 144.00<br>(120.00,182.70)       | 154.00<br>(124.00,200.45)        | 166.00<br>(130.40,223.00)         | 0.57               | <b>0.0049</b>      | <b>0.038</b>       |
| Bilirubin (mg/dL) [median (Q1,Q3)]                         | 0.53 (0.39,0.71)                 | 0.60 (0.40,0.71)                | 0.54 (0.40,0.71)                 | 0.50 (0.36,0.71)                  | n.s                | n.s                | n.s                |
| Creatinine (mg/dL) [median (Q1,Q3)]                        | 0.85 (0.70,1.12)                 | 0.81 (0.67,1.06)                | 0.80 (0.66,1.06)                 | 0.93 (0.74,1.25)                  | 1.000              | <b>0.0024</b>      | <b>&lt; 0.0001</b> |
| Platelets (cells x 10 <sup>3</sup> /mL) [median (Q1,Q3)]   | 233.00<br>(178.00,308.75)        | 284.50<br>(209.25,375.25)       | 233.00<br>(181.00,305.00)        | 210.00<br>(162.00,279.00)         | <b>&lt; 0.0001</b> | <b>&lt; 0.0001</b> | <b>0.0079</b>      |
| GPT (U/L) [median (Q1,Q3)]                                 | 39.00 (25.00,64.00)              | 37.50 (22.88,70.00)             | 41.00 (26.00,64.00)              | 37.00 (24.00,60.00)               | n.s                | n.s                | n.s                |
| C-reactive protein (mg/L)[median (Q1,Q3)]                  | 111.00 (56.00,210.00)            | 70.00 (28.58,174.83)            | 107.00 (58.50,199.40)            | 131.75 (64.48,233.23)             | <b>0.0097</b>      | <b>&lt; 0.0001</b> | <b>0.012</b>       |
| Hematocrit (%) [median (Q1,Q3)]                            | 40.00 (37.00,43.48)              | 40.40 (36.60,44.00)             | 40.20 (37.20,40.30)              | 39.60 (36.48,43.48)               | n.s                | n.s                | n.s                |
| WBC (cells x 10 <sup>3</sup> /mL) [median (Q1,Q3)]         | 9.40 (6.82,12.98)                | 10 (7.50,13.66)                 | 8.92 (6.79,12.12)                | 9.73 (6.47,13.34)                 | n.s                | n.s                | n.s                |
| Lymphocytes (cells x 10 <sup>3</sup> /mL) [median (Q1,Q3)] | 0.66 (0.42,0.95)                 | 0.80 (0.50,1.20)                | 0.68 (0.45,0.92)                 | 0.60 (0.39,0.90)                  | 0.28               | <b>0.0026</b>      | 0.068              |
| Neutrophils (cells x 10 <sup>3</sup> /mL) [median (Q1,Q3)] | 8.22 (5.80,11.51)                | 8.95 (6.30,12.22)               | 7.68 (5.60,10.70)                | 8.86 (5.78,12.11)                 | <b>0.026</b>       | 1.000              | <b>0.035</b>       |
| Monocytes (cells x 10 <sup>3</sup> /mL) [median (Q1,Q3)]   | 0.38 (0.21,0.57)                 | 0.40 (0.30,0.70)                | 0.39 (0.20,0.58)                 | 0.33 (0.20,0.50)                  | <b>0.031</b>       | <b>&lt; 0.0001</b> | 0.055              |
| Anti-SARS-CoV-2 S IgM (AUC) [median (Q1,Q3)]               | 41.54 (1.97,153.90)              | 67.83 (11.03,271.15)            | 55.57 (5.26,197.20)              | 9.81 (0.00,75.03)                 | 0.43               | <b>&lt; 0.0001</b> | <b>&lt; 0.0001</b> |
| Anti-SARS-CoV-2 S IgG (AUC) [median (Q1,Q3)]               | 177.00 (18.30,892.50)            | 787.25<br>(114.20,2028.50)      | 268.80<br>(39.94,1012.00)        | 39.17 (1.44,252.05)               | <b>0.0018</b>      | <b>&lt; 0.0001</b> | <b>&lt; 0.0001</b> |
| Inhibition of S-ACE2 binding > 50% [n (%)]                 | 404 (52.70)                      | 114 (76.00)                     | 198 (55.30)                      | 92 (35.50)                        | <b>&lt; 0.0001</b> | <b>&lt; 0.0001</b> | <b>&lt; 0.0001</b> |
| RNase P (copies/mL) [median (Q1,Q3)]                       | 78611.19<br>(37953.57,144050.50) | 38304.96<br>(15692.01,75370.32) | 74674.03<br>(38678.28,127591.27) | 125620.79<br>(63143.87,235809.30) | <b>&lt; 0.0001</b> | <b>&lt; 0.0001</b> | <b>&lt; 0.0001</b> |

**Supplementary file 7.** Laboratory parameters. Statistics: Continuous variables are represented as [median (quartile 1, quartile 3 (Q1, Q3))] and categorical variables as absolute count [(n, (%)]. P-values were assessed by using the Kruskal–Wallis test with Bonferroni post hoc test adjustment, and Chi-squared tests for categorical variables. Significant differences (p < 0.05) are shown in bold. Missing data were present for temperature (40), glucose (28), GPT (94), C-reactive protein (57), hematocrit (52), WBC (28), lymphocytes (47), neutrophils (70), monocytes (74), anti-SARS-CoV-2 S IgM (1), anti-SARS-CoV-2 S IgG (1) and inhibition of S-ACE2 binding > 50% (69). Abbreviations: p-value, level of significance; n.s, not statistically significant; GPT, glutamic-pyruvic transaminase; WBC, white blood cells.

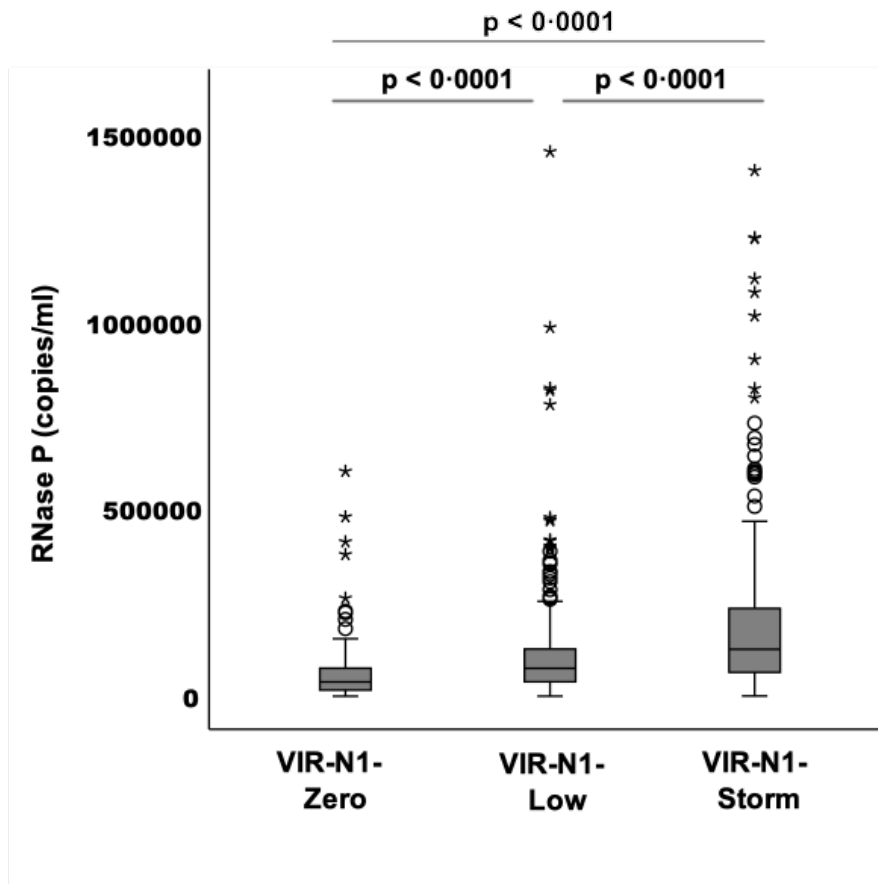

Supplementary file 8. Levels of RNase P mRNA in plasma (copies/ml).

| Measurements at ICU admission [median (Q1,Q3)] | No. | All patients (836)                    | VIR-N1-Zero (150)<br>1               | VIR-N1-Low (403)<br>2                 | VIR-N1-Storm (283)<br>3               | Healthy Controls (20)<br>0         | p-value (0 vs. 1) | p-value (0 vs. 2) | p-value (0 vs. 3) | p-value (1 vs. 2) | p-value (1 vs. 3) | p-value (2 vs. 3) |
|------------------------------------------------|-----|---------------------------------------|--------------------------------------|---------------------------------------|---------------------------------------|------------------------------------|-------------------|-------------------|-------------------|-------------------|-------------------|-------------------|
| ICAM-1 (pg/ml)                                 | 831 | 425180·50<br>(346895·00,528326·00)    | 408121·00<br>(331647·00,516557·50)   | 417817·00<br>(343761·25,524101·50)    | 440320·50<br>(362610·75,537795·25)    | 293497·00<br>(256013·25,343634·50) | < 0·0001          | < 0·0001          | < 0·0001          | 1·000             | 0·58              | 0·39              |
| Lipocalin -2 (pg/ml)                           | 831 | 98533·00<br>(74418·00,135066·00)      | 98188·00<br>(72977·00,131069·50)     | 95300·50<br>(73353·75,132686·50)      | 105324·50<br>(79896·25,144261·75)     | 91579·50<br>(85111·25,110544·50)   | n·s               | n·s               | n·s               | n·s               | n·s               | n·s               |
| Myeloperoxidase (pg/ml)                        | 831 | 176813·00<br>(106385·00,305477·00)    | 130545·00<br>(91966·00,227232·50)    | 159731·50<br>(94263·00,271109·25)     | 223763·00<br>(138683·25,385361·75)    | 31955·50<br>(21451·25,46467·75)    | < 0·0001          | < 0·0001          | < 0·0001          | 0·38              | < 0·0001          | < 0·0001          |
| VCAM-1 (pg/ml)                                 | 831 | 1245995·00<br>(959614·00,1611304·00)  | 1083354·00<br>(808838·50,1449106·00) | 1205079·50<br>(932743·00,1531594·25)  | 1410407·00<br>(1045792·00,1786010·75) | 686543·50<br>(574934·75,757602·75) | < 0·0001          | < 0·0001          | < 0·0001          | 0·092             | < 0·0001          | < 0·0001          |
| D-dimer (pg/ml)                                | 817 | 1940664·00<br>(1069870·00,4160595·50) | 1469475·00<br>(923574·75,3454350·25) | 1894675·00<br>(1008786·25,4039864·50) | 2407209·00<br>(1279762·50,4755883·00) | 267184·50<br>(189371·75,416976·00) | < 0·0001          | < 0·0001          | < 0·0001          | 0·52              | <b>0·0038</b>     | 0·12              |
| E-selectin (pg/ml)                             | 831 | 27809·00<br>(20429·00,37945·00)       | 25993·00<br>(18858·00,39072·50)      | 27795·50<br>(20972·50,37430·75)       | 29012·50<br>(20751·75,41107·00)       | 22180·00<br>(18214·25,28538·25)    | n·s               | n·s               | n·s               | n·s               | n·s               | n·s               |
| Ferritin (pg/ml)                               | 831 | 1189776·00<br>(628530·00,2082095·00)  | 926904·0<br>(476101·00,1728296·50)   | 1182345·00<br>(660826·00,2028756·50)  | 1374003·00<br>(676819·75,2403001·75)  | 67128·50<br>(38397·75,94993·25)    | < 0·0001          | < 0·0001          | < 0·0001          | <b>0·048</b>      | <b>0·0005</b>     | 0·36              |
| Rantes (pg/ml)                                 | 806 | 23228·00<br>(13020·50,40708·50)       | 24058·00<br>(12242·50,42716·00)      | 23272·00<br>(12865·00,42306·00)       | 22410·50<br>(13407·50,39582·75)       | 16707·00<br>(12685·50,25515·75)    | n·s               | n·s               | n·s               | n·s               | n·s               | n·s               |
| CD27 (pg/ml)                                   | 810 | 7862·50<br>(5616·75,11519·75)         | 7769·00<br>(5380·00,11488·50)        | 8089·00<br>(5659·25,11490·75)         | 7761·00<br>(5669·50,11770·50)         | 3983·00<br>(3524·50,4336·50)       | < 0·0001          | < 0·0001          | < 0·0001          | 1·0000            | 1·0000            | 1·0000            |
| Fas (pg/ml)                                    | 810 | 14184·00<br>(10704·25,18964·25)       | 14363·00<br>(10409·00,18460·00)      | 13910·00<br>(10706·25,18687·00)       | 14829·00<br>(10947·00,19978·00)       | 8530·00<br>(7116·25,11378·75)      | < 0·0001          | < 0·0001          | < 0·0001          | 1·0000            | 1·0000            | 1·0000            |
| SP-D (pg/ml)                                   | 830 | 18006·50<br>(9635·00,35265·75)        | 14888·00<br>(8731·00,31361·00)       | 17444·50<br>(9144·25,33170·25)        | 20577·00<br>(11216·00,41867·50)       | 6136·00<br>(4704·25,9382·00)       | <b>0·0001</b>     | < 0·0001          | < 0·0001          | 1·000             | 0·11              | 0·29              |
| PTX3 (pg/ml)                                   | 809 | 29693·00<br>(13164·50,64399·50)       | 15671·00<br>(8279·00,32889·00)       | 27487·00<br>(12085·50,59533·25)       | 45964·50<br>(21353·50,93351·50)       | 1400·00<br>(766·50,2195·00)        | < 0·0001          | < 0·0001          | < 0·0001          | < 0·0001          | < 0·0001          | < 0·0001          |
| IL-10 (pg/ml)                                  | 829 | 13·30 (7·50,23·85)                    | 6·73 (4·03,14·45)                    | 11·90 (7·38,19·50)                    | 20·80 (12·50,33·45)                   | 1·29 (1·11,1·81)                   | < 0·0001          | < 0·0001          | < 0·0001          | < 0·0001          | < 0·0001          | < 0·0001          |
| IL-17A (pg/ml)                                 | 829 | 0·12 (0·00,0·85)                      | 0·00 (0·00,0·56)                     | 0·15 (0·00,0·93)                      | 0·23 (0·00,0·97)                      | 0·04 (0·00,0·32)                   | 1·0000            | 0·63              | 0·39              | 0·054             | <b>0·015</b>      | 1·000             |
| GM-CSF (pg/ml)                                 | 829 | 1·17 (0·72,1·80)                      | 0·95 (0·63,1·45)                     | 1·19 (0·75,1·79)                      | 1·31 (0·75,1·94)                      | 0·83 (0·61,1·17)                   | 1·0000            | 0·13              | <b>0·025</b>      | <b>0·025</b>      | <b>0·0003</b>     | 0·51              |
| IL-7 (pg/ml)                                   | 829 | 6·71 (4·22,10·95)                     | 6·91 (4·22,10·70)                    | 6·34 (4·04,10·50)                     | 6·98 (4·33,12·00)                     | 2·59 (1·91,3·36)                   | < 0·0001          | < 0·0001          | < 0·0001          | 1·0000            | 1·0000            | 1·0000            |
| CXCL10 (pg/ml)                                 | 828 | 1613·00 (965·25,2516·75)              | 783·00 (356·00,1266·50)              | 1482·50 (945·00,2236·25)              | 2345·00<br>(1648·00,3198·00)          | 112·50 (69·53,160·75)              | <b>0·0023</b>     | < 0·0001          | < 0·0001          | < 0·0001          | < 0·0001          | < 0·0001          |
| Angiopoietin-2 (pg/ml)                         | 830 | 1202·50 (784·00,1810·00)              | 1165·00 (775·50,1728·50)             | 1157·00 (753·50,1766·25)              | 1278·00 (819·00,1994·00)              | 825·00<br>(703·25,1054·25)         | 0·093             | 0·070             | <b>0·0086</b>     | 1·000             | 0·67              | 0·24              |
| IL-1RA (pg/ml)                                 | 824 | 935·00 (596·25,1835·25)               | 755·00 (472·50,1457·50)              | 861·50 (589·00,1609·50)               | 1261·00 (718·00,2755·00)              | 460·50<br>(181·75,1235·75)         | 0·38              | 0·028             | < 0·0001          | 0·18              | < 0·0001          | < 0·0001          |
| IL-6 (pg/ml)                                   | 830 | 49·95 (17·35,174·50)                  | 23·60 (7·75,70·95)                   | 43·80 (15·20,163·25)                  | 85·80 (30·85,311·00)                  | 1·65 (1·18,2·07)                   | < 0·0001          | < 0·0001          | < 0·0001          | <b>0·0013</b>     | < 0·0001          | < 0·0001          |
| CCL2 (pg/ml)                                   | 829 | 422·00 (242·50,746·00)                | 260·00 (166·00,471·50)               | 394·00 (239·50,644·25)                | 572·50 (317·50,1046·75)               | 139·00<br>(110·00,163·50)          | <b>0·0004</b>     | < 0·0001          | < 0·0001          | < 0·0001          | < 0·0001          | < 0·0001          |
| IL-12p70 (pg/ml)                               | 829 | 0·64 (0·36,0·96)                      | 0·61 (0·38,0·84)                     | 0·62 (0·36,0·95)                      | 0·66 (0·36,1·02)                      | 0·88 (0·67,1·07)                   | n·s               | n·s               | n·s               | n·s               | n·s               | n·s               |
| IL-2 (pg/ml)                                   | 829 | 0·23 (0·04,0·56)                      | 0·09 (0·00,0·27)                     | 0·23 (0·03,0·54)                      | 0·35 (0·09,0·73)                      | 0·12 (0·04,0·25)                   | 1·0000            | 0·37              | <b>0·019</b>      | <b>0·0003</b>     | < 0·0001          | <b>0·0062</b>     |
| IL-4 (pg/ml)                                   | 829 | 0·15 (0·05,0·29)                      | 0·17 (0·09,0·26)                     | 0·16 (0·05,0·31)                      | 0·14 (0·04,0·26)                      | 0·28 (0·19,0·52)                   | <b>0·017</b>      | <b>0·0049</b>     | <b>0·0011</b>     | 1·000             | 0·73              | 1·0000            |
| IL-15 (pg/ml)                                  | 829 | 6·33 (4·95,8·31)                      | 5·38 (4·33,7·11)                     | 6·13 (4·84,7·82)                      | 7·40 (5·59,9·08)                      | 2·25 (2·02,2·50)                   | < 0·0001          | < 0·0001          | < 0·0001          | <b>0·020</b>      | < 0·0001          | < 0·0001          |

|                       |     |                         |                         |                         |                         |                            |          |          |          |          |          |          |
|-----------------------|-----|-------------------------|-------------------------|-------------------------|-------------------------|----------------------------|----------|----------|----------|----------|----------|----------|
| Granzyme B (pg/ml)    | 829 | 26.70 (18.15,42.50)     | 21.00 (13.05,28.90)     | 26.75 (18.00,41.70)     | 30.15 (21.60,54.23)     | 13.35 (8.82,20.05)         | 0.098    | < 0.0001 | < 0.0001 | < 0.0001 | < 0.0001 | 0.0026   |
| IFN- $\gamma$ (pg/ml) | 828 | 1.93 (0.86,5.96)        | 0.75 (0.36,2.19)        | 1.84 (0.96,5.81)        | 3.26 (1.47,9.20)        | 0.60 (0.50,0.89)           | 0.50     | < 0.0001 | < 0.0001 | < 0.0001 | < 0.0001 | < 0.0001 |
| TNF- $\alpha$ (pg/ml) | 828 | 11.40 (8.66,15.58)      | 10.00 (0.74,13.00)      | 11.00 (8.42,15.23)      | 12.60 (9.67,17.45)      | 6.11 (5.33,7.03)           | < 0.0001 | < 0.0001 | < 0.0001 | 0.038    | < 0.0001 | 0.0011   |
| Endothelin-1 (pg/ml)  | 806 | 2.33 (1.60,3.46)        | 1.86 (1.30,2.84)        | 2.23 (1.51,3.30)        | 2.82 (1.87,4.11)        | 1.12 (0.52,1.28)           | 0.0002   | < 0.0001 | < 0.0001 | 0.035    | < 0.0001 | < 0.0001 |
| Granzyme A (pg/ml)    | 806 | 72.25 (55.63,95.20)     | 71.10 (52.40,91.90)     | 69.70 (55.88,94.33)     | 76.50 (56.80,101.00)    | 99.75 (85.33,120.75)       | 0.0004   | 0.0007   | 0.0038   | 1.0000   | 0.69     | 1.0000   |
| IFN- $\alpha$ (pg/ml) | 806 | 1.24 (0.45,4.42)        | 0.73 (0.26,1.76)        | 1.24 (0.46,3.66)        | 1.95 (0.62,5.90)        | 0.00 (0.00,0.19)           | < 0.0001 | < 0.0001 | < 0.0001 | 0.010    | < 0.0001 | 0.012    |
| IL-8 (pg/ml)          | 806 | 18.30 (11.76,27.00)     | 13.30 (8.91,20.80)      | 17.20 (11.85,24.10)     | 22.20 (15.40,34.40)     | 3.72 (2.86,6.07)           | < 0.0001 | < 0.0001 | < 0.0001 | 0.0019   | < 0.0001 | < 0.0001 |
| CTLA-4 (pg/ml)        | 806 | 6.62 (4.32,10.70)       | 5.73 (3.74,9.62)        | 6.51 (4.15,10.58)       | 7.24 (4.81,12.10)       | 3.56 (2.70,9.79)           | 0.39     | 0.053    | 0.0077   | 0.58     | 0.016    | 0.40     |
| EGF (pg/ml)           | 807 | 34.70 (14.10,79.20)     | 37.10 (12.60,90.50)     | 32.50 (14.00,79.50)     | 37.50 (14.95,76.65)     | 64.45 (46.18,92.65)        | 0.073    | 0.030    | 0.045    | 1.0000   | 1.0000   | 1.0000   |
| TREM-1 (pg/ml)        | 806 | 608.00 (426.50,821.00)  | 552.00 (361.00,759.00)  | 577.00 (401.25,799.50)  | 672.00 (503.00,859.50)  | 322.00<br>(271.00,386.00)  | < 0.0004 | < 0.0001 | < 0.0001 | 1.000    | 0.0001   | 0.0005   |
| uPA (pg/ml)           | 806 | 913.00 (719.75,1136.75) | 829.00 (657.50,1062.50) | 890.00 (698.50,1116.00) | 996.00 (799.00,1232.00) | 942.50<br>(815.50,1177.00) | 0.39     | 1.0000   | 1.000    | 0.32     | < 0.0001 | 0.0006   |
| PD-L1 (pg/ml)         | 830 | 211.00 (161.00,290.00)  | 174.00 (127.00,240.50)  | 199.00 (155.00,264.00)  | 249.00 (197.00,328.25)  | 71.75 (59.38,105.50)       | 0.0008   | < 0.0001 | < 0.0001 | 0.014    | < 0.0001 | < 0.0001 |
| G-CSF (pg/ml)         | 829 | 48.70 (28.75,87.50)     | 39.10 (21.75,61.10)     | 47.80 (27.40,84.20)     | 55.20 (38.50,102.00)    | 11.10 (6.54,17.83)         | < 0.0001 | < 0.0001 | < 0.0001 | 0.019    | < 0.0001 | 0.0006   |
| IFN- $\beta$ (pg/ml)  | 799 | 0.07 (0.00,1.47)        | 0.09 (0.00,1.56)        | 0.14 (0.00,1.55)        | 0.01 (0.00,1.32)        | 0.00 (0.00,0.25)           | n.s      | n.s      | n.s      | n.s      | n.s      | n.s      |
| IL-1 $\beta$ (pg/ml)  | 828 | 0.22 (0.11,0.40)        | 0.21 (0.12,0.39)        | 0.22 (0.10,0.40)        | 0.24 (0.12,0.40)        | 0.56 (0.09,2.53)           | n.s      | n.s      | n.s      | n.s      | n.s      | n.s      |

**Supplementary file 9.** Biomarkers levels in VIR-N1-Zero, VIR-N1-Low, VIR-N1-Storm patients and healthy controls. Statistics: Continuous variables are represented as [median, (quartile 1, quartile 3 (Q1, Q3))], differences were assessed by using the Kruskal–Wallis test with Bonferroni post hoc test adjustment. Significant differences ( $p < 0.05$ ) are shown in bold. N.s means “not significant” in the Kruskal–Wallis test.
